# Supplementary material for: <strong></strong>Mathematical Modelling to Study the Horizontal Transfer of Antimicrobial Resistance Genes in Bacteria: Current State of the Field and Recommendations
Source: Preprints.org preprint supplement (doi:10.20944/preprints201904.0161.v2), 2019-05-06
Supplement: Supplementary file 2 [file supplementary]

## Sheet: Sheet1
RECORDED ELEMENT	Authors	Year	Transfer mechanism	Bacteria	Aim of the study	Bacterial container	Antibiotic effect considered	Multiple resistances considered	Fitness cost of resistance considered	Source of model parameters	Source of model parameters (continued)	Type of model	Type of parameter values	Sensitivity analysis performed
POSSIBLE VALUES	-	-	Conjugation OR Transformation OR Transduction	-	Evolutionary OR Public health OR Both	-	Yes OR No	Yes OR No	Yes OR No	Experimental AND/OR External AND/OR Assume	Number of external sources used	Deterministic OR Stochastic OR Both	Constant OR Sampled	Yes OR No
A high-throughput approach to the culture-based estimation of plasmid transfer rates.	Kneis, David; Hiltunen, Teppo; Hess, Stefanie	2019	Conjugation	E. coli, S. marcescens	Evolutionary	Culture	No	No	Yes	Experimental	-	Deterministic	Constant	Yes
A kinetic model for horizontal transfer and bacterial antibiotic resistance	Knopoff, Damian A; Sanchez Sanso, Juan M	2017	Conjugation	None specified	Evolutionary	None specified	Yes	No	No	Assume	-	Deterministic	Constant	No
A kinetic model of gene transfer via natural transformation of Azotobacter vinelandii	Lu, Nanxi; Massoudieh, Arash; Liang, Xiaomeng; Kamai, Tamir; Zilles, Julie L; Nguyen, Thanh H; Ginn, Timothy R	2015	Transformation	A. vinelandii	Evolutionary	Culture	No	No	No	Experimental	-	Deterministic	Constant	Yes
A model of antibiotic-resistant bacterial epidemics in hospitals.	Webb, Glenn F; D'Agata, Erika M C; Magal, Pierre; Ruan, Shigui	2005	Conjugation	None specified	Public health	Human	Yes	No	Yes	Assume	-	Deterministic	Sampled	Yes
A network-based approach for resistance transmission in bacterial populations	Gehring, Ronette; Schumm, Phillip; Youssef, Mina; Scoglio, Caterina	2010	Conjugation	None specified	Evolutionary	None specified	Yes	No	Yes	Assume	-	Both	Sampled	Yes
Accounting for mating pair formation in plasmid population dynamics	Zhong, Xue; Krol, Jarosław E; Top, Eva M; Krone, Stephen M	2010	Conjugation	E. coli	Evolutionary	Culture	No	No	No	Experimental	-	Deterministic	Constant	Yes
Antibiotics as a selective driver for conjugation dynamics.	Lopatkin, Allison J Huang, Shuqiang Smith, Robert P Srimani, Jaydeep K; Sysoeva, Tatyana A; Bewick, Sharon; Karig, David K; You, Lingchong	2016	Conjugation	E. coli, K. pneumonia	Evolutionary	Culture	Yes	No	Yes	Experimental	-	Deterministic	Constant	Yes
Effects of nano-TiO2 on antibiotic resistance transfer mediated by RP4 plasmid	Qiu, Zhigang; Shen, Zhiqiang; Qian, Di; Jin, Min; Yang, Dong; Wang, Jingfeng; Zhang, Bin; Yang, Zhongwei; Chen, Zhaoli; Wang, Xinwei; Ding, Chengshi; Wang, Daning; Li, Jun-Wen	2015	Conjugation	E. coli	Evolutionary	Culture	No	No	No	Experimental	-	Deterministic	Constant	No
Episodic selection and the maintenance of competence and natural transformation in Bacillus subtilis	Johnsen, P J; Dubnau, D; Levin, B R	2009	Transformation	B. subtilis	Evolutionary	Culture	Yes	No	Yes	Experimental, assume	-	Stochastic	Sampled	No
Estimating the rate of plasmid transfer: an end-point method	Simonsen, L.; Gordon, D. M.; Stewart, F. M.; Levin, B. R.	1990	Conjugation	E. coli	Evolutionary	Culture	No	No	Yes	Experimental	-	Deterministic	Constant	Yes
Evaluating targets for control of plasmid-mediated antimicrobial resistance in enteric commensals of beef cattle: a modelling approach	Volkova, V V; Lu, Z; Lanzas, C; Grohn, Y T	2013	Conjugation	E. coli	Public health	Beef feedlot's pen	Yes	No	Yes	External, assume	12	Deterministic	Sampled	Yes
Evaluating the effect of horizontal transmission on the stability of plasmids under different selection regimes	Peña-Miller, Rafael; Rodríguez-González, Rogelio; MacLean, R Craig; San Millan, Alvaro	2015	Conjugation	P. aeruginosa	Evolutionary	Culture	Yes	No	Yes	External, assume	1	Deterministic	Constant	Yes
Experimental and mathematical models of Escherichia coli plasmid transfer in vitro and in vivo.	Freter, R; Freter, R R; Brickner, H	1983	Conjugation	E. coli	Evolutionary	Culture, mice	No	No	Yes	Experimental	-	Deterministic	Constant	No
Fate of sulfadiazine administered to pigs and its quantitative effect on the dynamics of bacterial resistance genes in manure and manured soil	Heuer, Holger; Focks, Andreas; Lamshoeft, Marc; Smalla, Kornelia; Matthies, Michael; Spiteller, Michael	2008	Conjugation	None specified	Evolutionary	Manure	Yes	No	Yes	Experimental	-	Deterministic	Constant	Yes
Genetic Drift Suppresses Bacterial Conjugation in Spatially Structured Populations	Freese, Peter D; Korolev, Kirill S; Jimenez, Jose I; Chen, Irene A	2014	Conjugation	E. coli	Evolutionary	Culture	No	No	Yes	Experimental, assume	-	Both	Sampled	Yes
Implications of stress induced genetic variation for minimizing multidrug resistance in bacteria	Obolski, Uri; Hadany, Lilach	2012	Conjugation	None specified	Public health	Human	Yes	Yes	No	Assume	-	Deterministic	Sampled	Yes
Mathematical model for the transport of fluoroquinolone and its resistant bacteria in aquatic environment.	Gothwal, Ritu; Thatikonda, Shashidhar	2018	Conjugation	None specified	Evolutionary	River	Yes	No	Yes	Experimental, external	14	Deterministic	Constant	No
Mathematical model of plasmid-mediated resistance to ceftiofur in commensal enteric Escherichia coli of cattle	Volkova, Victoriya V; Lanzas, Cristina; Lu, Zhao; Gröhn, Yrjö Tapio	2012	Conjugation	E. coli	Evolutionary	Cattle	Yes	No	Yes	External, assume	13	Deterministic	Sampled	Yes
Mathematical modeling of bacterial resistance to antibiotics by mutations and plasmids	Ibargueen-Mondragon, Eduardo; Romero-Leiton, Jhoana P; Esteva, Lourdes; Mariela Burbano-Rosero, Edith	2016	Conjugation	M. tuberculosis	Both	Human	Yes	No	Yes	External, assume	8	Deterministic	Constant	No
Mathematical modelling of antimicrobial resistance in agricultural waste highlights importance of gene transfer rate	Baker, Michelle; Hobman, Jon L; Dodd, Christine E R; Ramsden, Stephen J; Stekel, Dov J	2016	Conjugation	E. coli	Evolutionary	Slurry tank	Yes	No	Yes	External	12	Deterministic	Constant	Yes
Mobile Compensatory Mutations Promote Plasmid Survival	Zwanzig, Martin; Harrison, Ellie; Brockhurst, Michael A; Hall, James P J; Berendonk, Thomas U; Berger, Uta	2019	Conjugation	None specified	Evolutionary	None specified	Yes	No	Yes	External	12	Deterministic	Sampled	Yes
Modeling the Evolutionary Dynamics of Plasmids in Spatial Populations	Connelly, Brian D; Zaman, Luis; McKinley, Philip K; Ofria, Charles	2011	Conjugation	None specified	Evolutionary	None specified	Yes	No	Yes	Assume	-	Stochastic	Sampled	Yes
Modeling the infection dynamics of bacteriophages in enteric Escherichia coli: estimating the contribution of transduction to antimicrobial gene spread	Volkova, Victoriya V; Lu, Zhao; Besser, Thomas; Gröhn, Yrjö T	2014	Transduction	E. coli	Evolutionary	Cattle	No	No	Yes	External, assume	13	Deterministic	Sampled	Yes
Modelling dynamics of plasmid-gene mediated antimicrobial resistance in enteric bacteria using stochastic differential equations	Volkova, Victoriya V; Lu, Zhao; Lanzas, Cristina; Scott, H Morgan; Gröhn, Yrjö T	2013	Conjugation	E. coli	Evolutionary	Cattle	Yes	No	Yes	External	1	Stochastic	Sampled	Yes
Modelling the spatial dynamics of plasmid transfer and persistence.	Krone, Stephen M; Lu, Ruinan; Fox, Randal; Suzuki, Haruo; Top, Eva M	2007	Conjugation	E. coli, Ochrobactrum	Evolutionary	Culture	No	No	Yes	Experimental	-	Deterministic	Constant	No
Monte Carlo simulations suggest current chlortetracycline drug-residue based withdrawal periods would not control antimicrobial resistance dissemination from feedlot to slaughterhouse	Cazer, Casey L.; Ducrot, Lucas; Volkova, Victoriya V.; Gröhn, Yrjö T.	2017	Conjugation	E. coli	Evolutionary	Cattle	Yes	No	Yes	External	42	Deterministic	Sampled	Yes
On the meaning and estimation of plasmid transfer rates for surface associated and well-mixed bacterial populations	Zhong, Xue; Droesch, Jason; Fox, Randal; Top, Eva M.; Krone, Stephen M.	2012	Conjugation	E. coli	Evolutionary	Culture	No	No	Yes	Experimental, external	3	Deterministic	Constant	No
Optimal dosing strategies against susceptible and resistant bacteria	Khan, Adnan; Imran, Mudassar	2018	Conjugation	None specified	Public health	Culture	Yes	No	Yes	Assume	-	Deterministic	Constant	No
Plasmids spread very fast in heterogeneous bacterial communities.	Dionisio, Francisco; Matic, Ivan; Radman, Miroslav; Rodrigues, Olivia R; Taddei, François	2002	Conjugation	E. coli, E. blattae, E. fergusonii, E. chrysantemi	Evolutionary	Culture	No	No	Yes	Experimental, assume	-	Deterministic	Constant	No
Predictive Modeling of a Batch Filter Mating Process	Malwade, Akshay; Nguyen, Angel; Sadat-Mousavi, Peivand; Ingalls, Brian P	2017	Conjugation	E. coli	Evolutionary	Culture	No	No	Yes	Experimental	-	Deterministic	Constant	Yes
Resource competition may lead to effective treatment of antibiotic resistant infections	Gomes, Antonio L C; Galagan, James E; Segrè, Daniel	2013	Conjugation	None specified	Both	Culture, human	Yes	Yes	Yes	External, assume	2	Deterministic	Constant	Yes
Simulating Multilevel Dynamics of Antimicrobial Resistance in a Membrane Computing Model	Campos, Marcelino; Capilla, Rafael; Naya, Fernando; Futami, Ricardo; Coque, Teresa; Moya, Andrés; Fernandez-Lanza, Val; Cantón, Rafael; Sempere, José M.; Llorens, Carlos; Baquero, Fernando	2019	Conjugation	E.coli, K. pneumonia, E. faecium, P. aeruginosa	Both	Human	Yes	Yes	Yes	Assume	-	Stochastic	Sampled	No
Source-sink plasmid transfer dynamics maintain gene mobility in soil bacterial communities	Hall, James P J; Wood, A Jamie; Harrison, Ellie; Brockhurst, Michael A	2016	Conjugation	P. fluorescens, P. putida	Evolutionary	Culture	No	No	Yes	Experimental, external	2	Deterministic	Constant	Yes
Static recipient cells as reservoirs of antibiotic resistance during antibiotic therapy	Willms, Allan R; Roughan, Paul D; Heinemann, Jack A	2006	Conjugation	None specified	Evolutionary	Culture	Yes	No	Yes	Assume	-	Deterministic	Sampled	No
The dominance of bacterial genotypes leads to susceptibility variations under sublethal antibiotic pressure.	Xu, Shilian; Yang, Jiaru; Yin, Chong; Zhao, Xiaohua	2018	Conjugation	None specified	Evolutionary	None specified	Yes	No	Yes	Assume	-	Deterministic	Constant	Yes
The evolution of plasmid-carried antibiotic resistance	Svara, Fabian; Rankin, Daniel J	2011	Conjugation	None specified	Evolutionary	Culture	Yes	No	Yes	Assume	-	Deterministic	Constant	Yes
The Impact of Different Antibiotic Regimens on the Emergence of Antimicrobial-Resistant Bacteria	D'Agata, Erika M. C.; Dupont-Rouzeyrol, Myrielle; Magal, Pierre; Olivier, Damien; Ruan, Shigui	2008	Conjugation	E. coli	Evolutionary	Human	Yes	Yes	Yes	External, assume	5	Deterministic	Constant	No
The IncI1 plasmid carrying the blaCTX-M-1 gene persists in in vitro culture of a Escherichia coli strain from broilers	Fischer, Egil AJ; Dierikx, Cindy M; van Essen-Zandbergen, Alieda; van Roermund, Herman JW; Mevius, Dik J; Stegeman, Arjan; Klinkenberg, Don	2014	Conjugation	E. coli	Evolutionary	Culture	No	No	Yes	Experimental	-	Deterministic	Constant	No
The influence of horizontal gene transfer on the mean fitness of unicellular populations in static environments.	Raz, Yoav; Tannenbaum, Emmanuel	2010	Conjugation	None specified	Evolutionary	None specified	Yes	No	Yes	Assume	-	Both	Sampled	Yes
The population biology of bacterial plasmids: a hidden Markov model approach.	Ponciano, José M; De Gelder, Leen; Top, Eva M; Joyce, Paul	2007	Conjugation	P. putida, P. koreensis, S. mathophilia, P. plecoglossicida, P. veronii, O. tritici, E. adhaerens	Evolutionary	Culture	No	No	Yes	Experimental	-	Both	Sampled	Yes
The Population Biology of Bacterial Plasmids: A PRIORI Conditions for the Existence of Conjugationally Transmitted Factors.	Stewart, F M; Levin, B R	1977	Conjugation	None specified	Evolutionary	None specified	Yes	No	Yes	Assume	-	Deterministic	Constant	Yes
Transitory derepression and the maintenance of conjugative plasmids	Lundquist, Peter D; Levin', Bruce R	1986	Conjugation	E. coli	Evolutionary	Culture	No	No	Yes	Experimental, assume	-	Deterministic	Constant	Yes
Within-Host and Population Transmission of bla(OXA-48) in K. pneumoniae and E. coli	Haverkate, Manon R Dautzenberg, Mirjam J D; Ossewaarde, Tjaco J M; van der Zee, Anneke; den Hollander, Jan G; Troelstra, Annet; Bonten, Marc J M; Bootsma, Martin C J	2015	Conjugation	E. coli, K. pneumonia	Public health	Human	No	No	No	External, assume	1	Deterministic	Constant	Yes
Supplementary Material: Summary table of the elements recorded in the 26 studies included in our review. E. coli: Escherichia coli; S. marcescens: Serratia marcescens; A. vinelandii: Azotobacter vinelandii; K. pneumonia: Klebsiella pneumonia; B. subtilis: Bacillus subtilis; E. blattae: Escherichia blattae; E. fergusonii: Escherichia fergusonii; E. chrysantemi: Erwinia chrysantemi; P. fluorescens:…
